# Supplementary material
Source: PubMed Central journal article supplement (PMC1865785)
Supplement: iai_75_5_2253__1.pdf [file iai_75_5_2253__1.pdf]

Table 1. The N-terminal sequences of 48 putative lipoproteins of *M. pneumoniae*

|    | MPN No. | AA Length | N-terminal lipoprotein sequence  | Subgroup* |
|----|---------|-----------|----------------------------------|-----------|
| 1  | MPN011  | 231       | CSATFEADLNLIKETDGGKDLVSKLIITS    | 1         |
| 2  | MPN052  | 657       | CGATRIWESSIQLLVSNDEATLADKSFSEM   |           |
| 3  | MPN054  | 123       | CSSIQSDLRNLIKETTGGKDFDVSKLIKTSE  | 1         |
| 4  | MPN058  | 485       | CSSNQFVFANFESYVSPLLLERA EAKQPMT  |           |
| 5  | MPN083  | 533       | CSFKDYIPTPSFRKDFSTENNFVKNKVP GK  |           |
| 6  | MPN097  | 541       | CGARGKFDQVDDGKIKLASSLTSRSASAAL   | 2         |
| 7  | MPN133  | 301       | CTRDYTTKNEFQLTTAQQA KLKPATIEYWR  |           |
| 8  | MPN152  | 794       | CGARGKFNQVDDGKIKLASSLTSRSASTAL   | 2         |
| 9  | MPN162  | 320       | CATPNTYEVQRAALIQLVEEDERQNYIQKG   |           |
| 10 | MPN199  | 760       | CGTGRFDQIDDGKIKLAVVTSPSAASSLQT   | 2         |
| 11 | MPN200  | 798       | CGTRGKFDQIDDGKIKLASSLTSKGAANAL   | 2         |
| 12 | MPN271  | 251       | CTGIQADLRNLIKETTGGKIDIDLSKAIKTKE | 1         |
| 13 | MPN281  | 377       | CGARGKFDQFDDGKIKLASSLTSKAAANAL   | 2         |
| 14 | MPN284  | 794       | CGARGKFDQVDDGKIVLASSLTSKGAANAL   | 2         |
| 15 | MPN288  | 787       | CGARGKFDQVDDGKIKLAFSLTSKSASNAL   | 2         |
| 16 | MPN363  | 102       | CGAKGKFDQVDDGKIVLASSLTSKNAANAL   | 2         |
| 17 | MPN369  | 253       | CTGIQADLRNLIKEATGKIDIDVYKAIKTTE  | 1         |
| 18 | MPN408  | 760       | CGARGKFDQVDDGVIKLATS IQNKDSIAAL  | 2         |
| 19 | MPN411  | 252       | CTGIQADLRNLIKEATGKIDIDLSKSIKTTD  | 1         |
| 20 | MPN415  | 380       | CARRESNHLIFNISLDHDADASISKFFELY   |           |
| 21 | MPN436  | 1244      | CATPSNSALQTVFKARSSQFFNGEQGS LQS  | 3         |
| 22 | MPN439  | 237       | CATPSNSALQAVFKPTSNQFFNGEHG TIQS  | 3         |
| 23 | MPN442  | 150       | CATPSNSALQTVFKARSNQFFNGEQGS LQN  | 3         |
| 24 | MPN456  | 1005      | CAAQARDVYVTSSASDLLKNNVPM SMFNV   | 4         |
| 25 | MPN459  | 591       | CAAQARDVYVTSSASDLLKNNLVP SMFNV   | 4         |
| 26 | MPN467  | 101       | CTGIQADLRNLIKETTGGKIDIDLSKAIKTKE | 1         |
| 27 | MPN489  | 1300      | CSALNTSNLFPRQNRSKQLIGFTENNI IKP  |           |
| 28 | MPN506  | 793       | CGTKGKFDQVDDGKIKLASSLTSKSASKAL   | 2         |
| 29 | MPN523  | 305       | CSNIDKPNVFRTLSQQSVENKVDYSKLPKE   |           |
| 30 | MPN582  | 439       | CSAFRKPDKFEGYYINNI PGSAEIDHANYD  | 5         |
| 31 | MPN585  | 302       | CAAFDKWQEFYINNIPSSTEIHRFN YDLNF  | 5         |
| 32 | MPN587  | 150       | CATISLSDKSGEFYINNIPSSAELHR INYD  | 5         |
| 33 | MPN588  | 531       | CAATQPNFEPNNIEESGPITPTTPTTDV PK  |           |
| 34 | MPN590  | 217       | CAPAVPVNNKSVSAVQPEDKQALKPDPALG   |           |
| 35 | MPN592  | 521       | CSATLTVANTNHKNESDKFVIFEPQPPLSQ   |           |
| 36 | MPN611  | 385       | CANINLISAVGSSSVQPLLSKLS SHYVLNH  |           |
| 37 | MPN602  | 207       | CTENVKEIKSESVINELFPNLWVFLAHL LA  |           |
| 38 | MPN639  | 287       | CSALVASVELKSLSELQNLADRNTELT KNK  | 6         |
| 39 | MPN640  | 300       | CSSATSQVISSLSSAQKYFEANKGELN KKN  | 6         |
| 40 | MPN641  | 276       | CSNSDFQTNLTSLNQLREGVNQNTSLTQDK   | 7         |
| 41 | MPN642  | 279       | CSSTTSQVISSLSSAQKYFEANKGELN KKN  | 6         |
| 42 | MPN643  | 302       | CSNSGFANLTSLNQLRTSASKNTNLTQNK    | 7         |
| 43 | MPN644  | 283       | CSSTATNVISSLSSAQKYFDAHKSELIKKN   | 6         |
| 44 | MPN645  | 283       | CSSAATQVISSLSSAQKYFESSQGELN KKN  | 6         |
| 45 | MPN646  | 277       | CSNYDFQANLTSLNQLRTSANKDINLTQDK   | 7         |
| 46 | MPN647  | 290       | CSSATTEVISSFSSAQKYFSANKKELN KRN  | 6         |
| 47 | MPN650  | 101       | CSSVNVGANLKS LIKETTQDLDLSESVST   | 1         |
| 48 | MPN654  | 129       | CTWIQANLRNLLKETTGGKDFDL SKAIKIPE | 1         |

\*1 – 7. Putative *M. pneumoniae* lipoproteins include seven groups of paralogous lipoproteins divided on the basis of similarity of the N-terminal 30 amino acid.
